# Supplementary material for: Barriers and opportunities to improve Smoke-free Area implementation in Aceh province, Indonesia
Source: Research Square preprint supplement (doi:10.21203/rs.3.rs-1981702/v1), 2022-08-30
Supplement: Supplementary file 1 [file 8072d6ec1e4ea226705c24c2.docx]

**Definitions and Concepts of Smoking**

Smoking can be defined, as the possession of an ignited tobacco product irrespective of the smoke is being inhaled or exhaled [1]. The Centers for Disease Control and Prevention (CDC) further expands the definition of smoking as the inhalation of smoke-burned tobacco substances that occurs either occasionally or habitually as a result of an addiction to nicotine and some other chemicals [2]. Much research indicates that nicotine and its metabolites such as carbon monoxide and thiocyanate are the most dangerous chemical substances to human cardiovascular and respiratory systems [3].

Different terms are commonly used interchangeably to describe the type of smoke in accordance with article 8 of the WHO FCTC including **second-hand smoke, environmental tobacco smoke, and other persons’ smoke** [1]. ‘Passive smoking’ and ‘involuntary exposure to tobacco smoke’ **need to be avoided** as some tobacco industry use these terms to support the ‘voluntary’ exposure is tolerable [4].

Second-hand tobacco smoke is the smoke produced from the cigarette ignition or from other tobacco products and often combined with the exhaled smoke by the smoker [5], [6].

**Smoke free Areas *(KTRs)*: Protection from Exposure to Tobacco Smoke**

Principally, the concept of **smoke free areas *(KTRs*)** is that the areas that are **100% smoke free air** indicated by the tobacco smoke is invisible, insensible and even immeasurable [7].

According to WHO FCTC (2003), some major areas need to enforce *KTRs* so as to protect nonsmokers and the environment from tobacco smoke exposure. These areas include indoor or enclosed places; workplaces; public places, and public transport [1].

- ***Indoor or enclosed places***

It is suggested that ‘indoor’ or ‘enclosed’ places are defined to include any area covered by a roof or bounded or enclosed by one or more walls or sides [1]. No matter the material used for roofs and walls or sides including its structure (permanent or temporary) [1]. According to article 8 of the FCTC**, these ‘indoor’ places limit to all indoor workplaces and public places** that require protection from tobacco smoke [7].

- ***Workplaces***

A workplace is defined broadly as not only all areas used by workers or employees during their work performance, but also all associated areas normally used by workers during their employment [4], for instance: walkways, lifts, steps, entrances, joint facilities, canteens, toilets, restaurants, and **outbuilding facilities such as storages and shelters as well as vehicle** used during the work [1].

- ***Public places***

Public places are defined vary between different authorities but they should include all sites or areas that can be accessed for all general people or commonly used collectively [1]. No matter the right to access and possession of those places.

- ***Public transport***

Public transport is defined as all transport means used for carrying the member of communities commonly for commercial purposes [1], [8]. This includes buses, minivans, taxis and other kinds of transport.

Hence, the definitions of smoking and its concepts including the type of smoke as well as the concept of *KTRs* and some aforementioned areas that need to be free from tobacco smoke need be introduced (through socialization) and understood by all relevant actors such as government stakeholders (policy makers, civil servants, practitioners, law enforcers (smoke free area enforced officers)), civil society, tobacco activists, business people, and the public in order to support the effectiveness implementation of smoke free areas *(KTRs)*.

**References**

[1] WHO FCTC, “Gudelines for implementation,” 2013. [Online]. Available: https://www.who.int/fctc/treaty_instruments/adopted/guidel_2011/en/.

[2] CDC, “Smoking and tobacco use: key terms and definitions,” 2020.

[3] A. Leone, L. Landini, and A. Leone, “What is tobacco smoke? Sociocultural dimensions of the association with cardiovascular risk,” *Curr Pharm Des.*, vol. 16, no. 23, pp. 2510–7, 2010.

[4] WHO, “Statement: World No Tobacco Day 2020,” Jakarta, 2020. [Online]. Available: https://www.who.int/indonesia/news/detail/30-05-2020-statement-world-no-tobacco-day-2020.

[5] WHO FCTC, “WHO Framework Convention on Tobacco Control,” 2003. [Online]. Available: http://apps.who.int/iris/bitstream/handle/10665/42811/9241591013.pdf;jsessionid=34DB0FF843984EBA14C3F51F185CBD6E?sequence=1.

[6] WHO, “Tobacco Free Initiative (TFI),” 2020. [Online]. Available: https://www.who.int/tobacco/training/smoke_free_policies/en/.

[7] WHO, “Protection from exposure to second-hand tobacco smoke,” 2007. [Online]. Available: https://apps.who.int/iris/handle/10665/43677.

[8] WHO, “A policy package to reverse the tobacco epidemic: MPOWER,” 2008. [Online]. Available: https://www.who.int/tobacco/mpower/mpower_english.pdf.
